# Supplementary material for: Phytochemical and Nutritional Profile Composition in Fruits of Different Sweet Chestnut (Castanea sativa Mill.) Cultivars Grown in Romania
Source: MDPI journal article supplement (doi:10.3390/separations9030066), 2022-03-02
Supplement: s1 [file s1]

## Supplementary material

### 1. Supplementary Figures

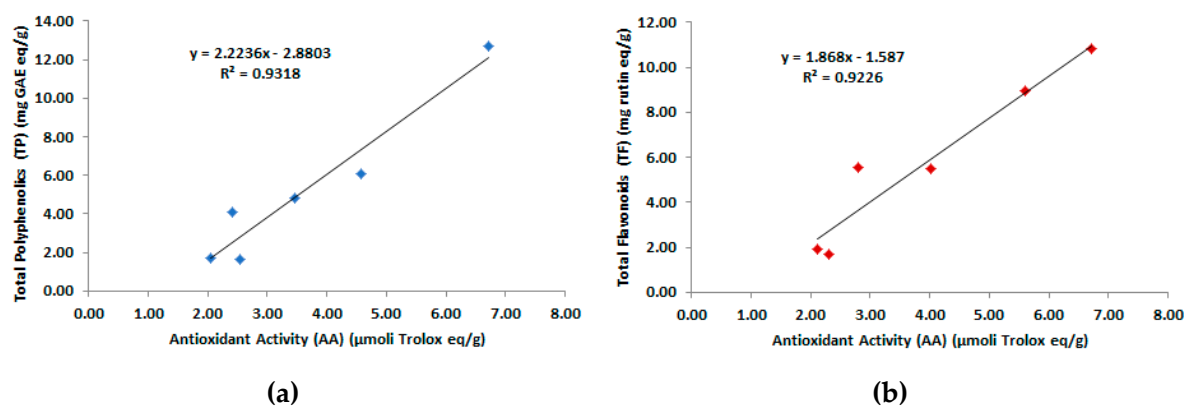

**Figure S1.** Correlation between: (a) Total Polyphenolics with Antioxidant Activity and (b) Total Flavonoids with Antioxidant Activity

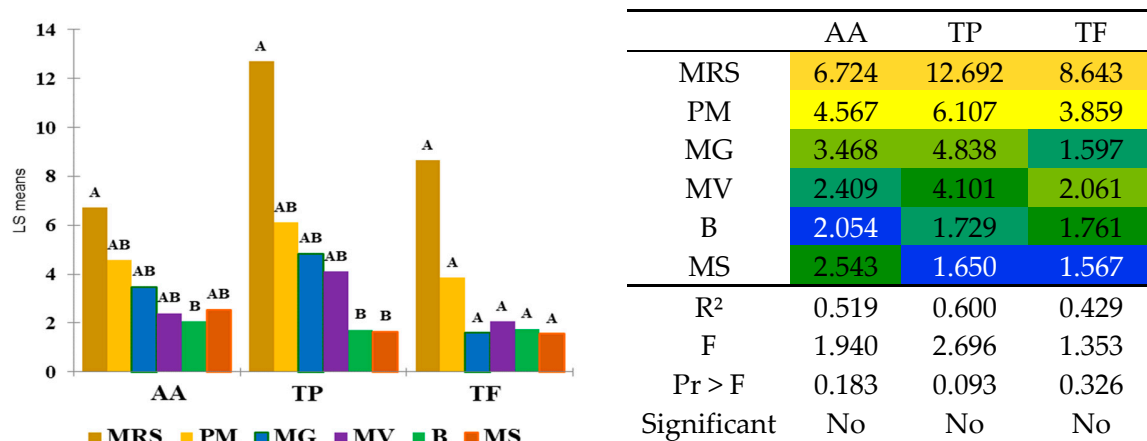

**Figure S2.** Variation of the Antioxidant Activity (AA), Total polyphenolics (TP) and Total Flavonoids (TF) in chestnut fruits of different sweet cultivars ('Précoce Migoule' - PM, 'Bournette' - B, 'Marsol' - MS, 'Marissard' - MRS, 'Marigoule' - MG and 'Maraval' - MV) harvested in 2015, 2016 and 2017. Different uppercase letters corresponding to the bars denote differences according to Duncan test  $p \leq 0.05$ .

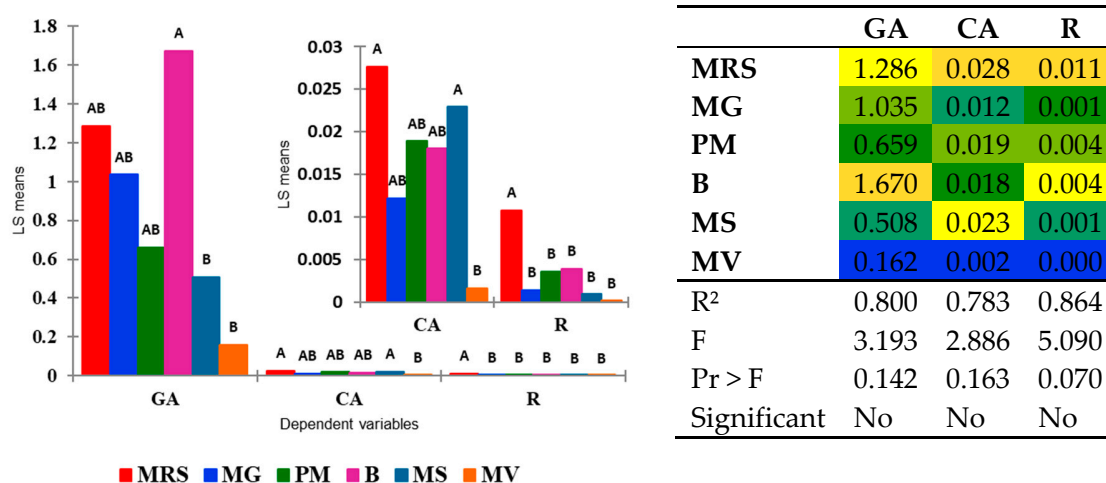

**Figure S3.** Variation of individual phenolic compounds (gallic acid – GA, cinnamic acid – CA and rutin – R) in chestnut fruits of different sweet cultivars ('Précoce Migoule' - PM, 'Bournette' - B, 'Marsol' - MS, 'Marissard' - MRS, 'Marigoule' - MG and 'Maraval' – MV) harvested in 2016 and 2017. Different uppercase letters corresponding to the bars denote differences according to Duncan test  $p \leq 0.05$ .

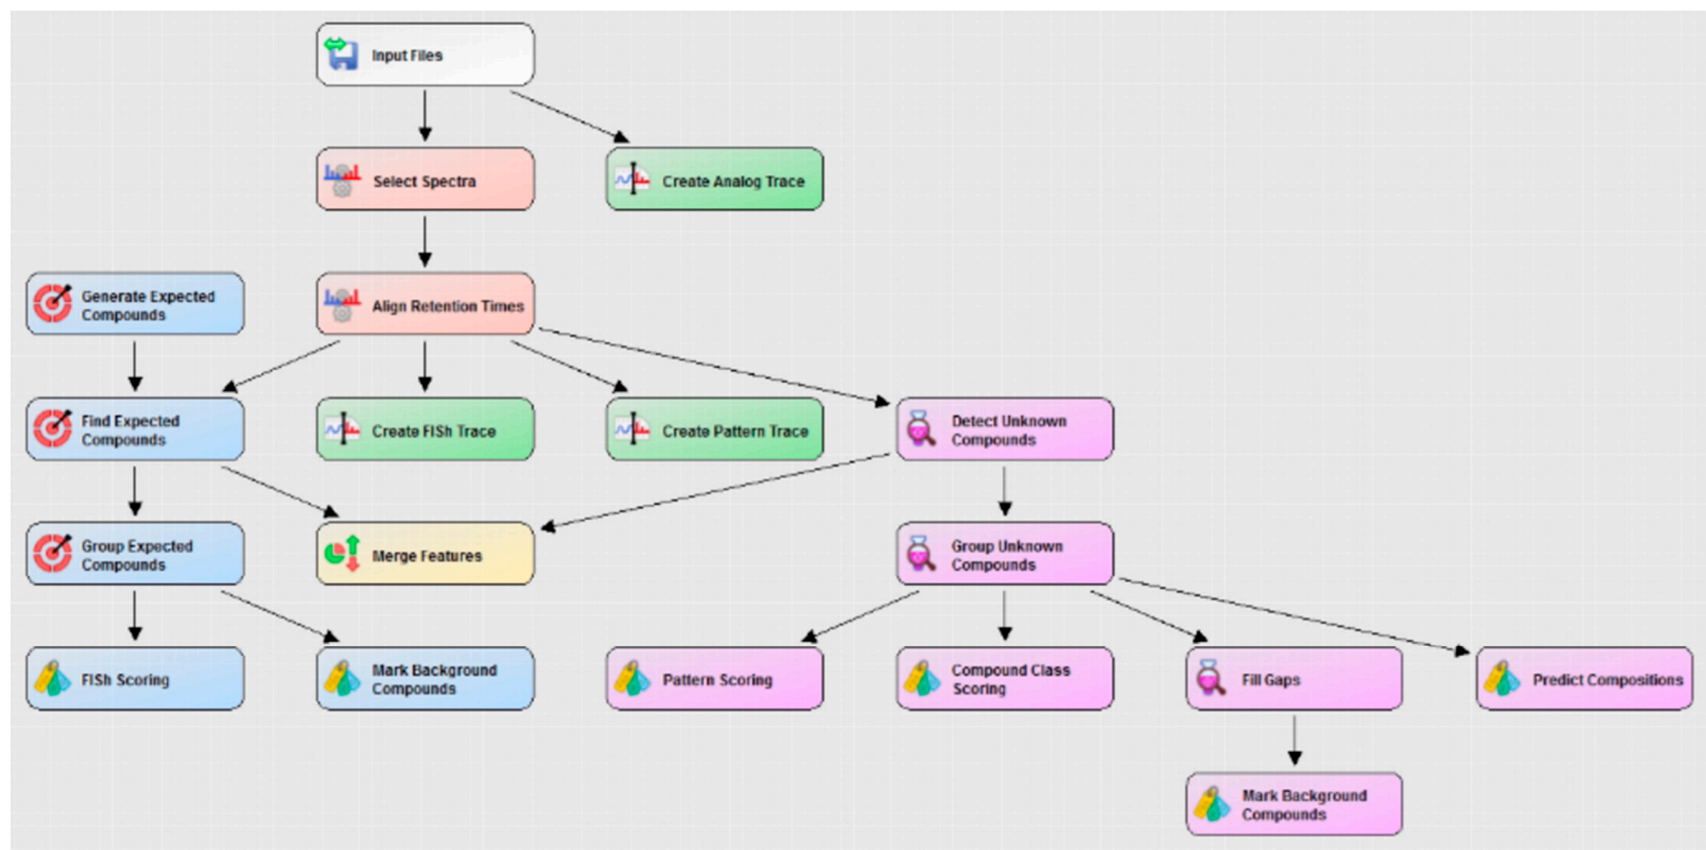

**Figure S4.** Untargeted Metabolomics workflow: Find and identify the differences between samples.

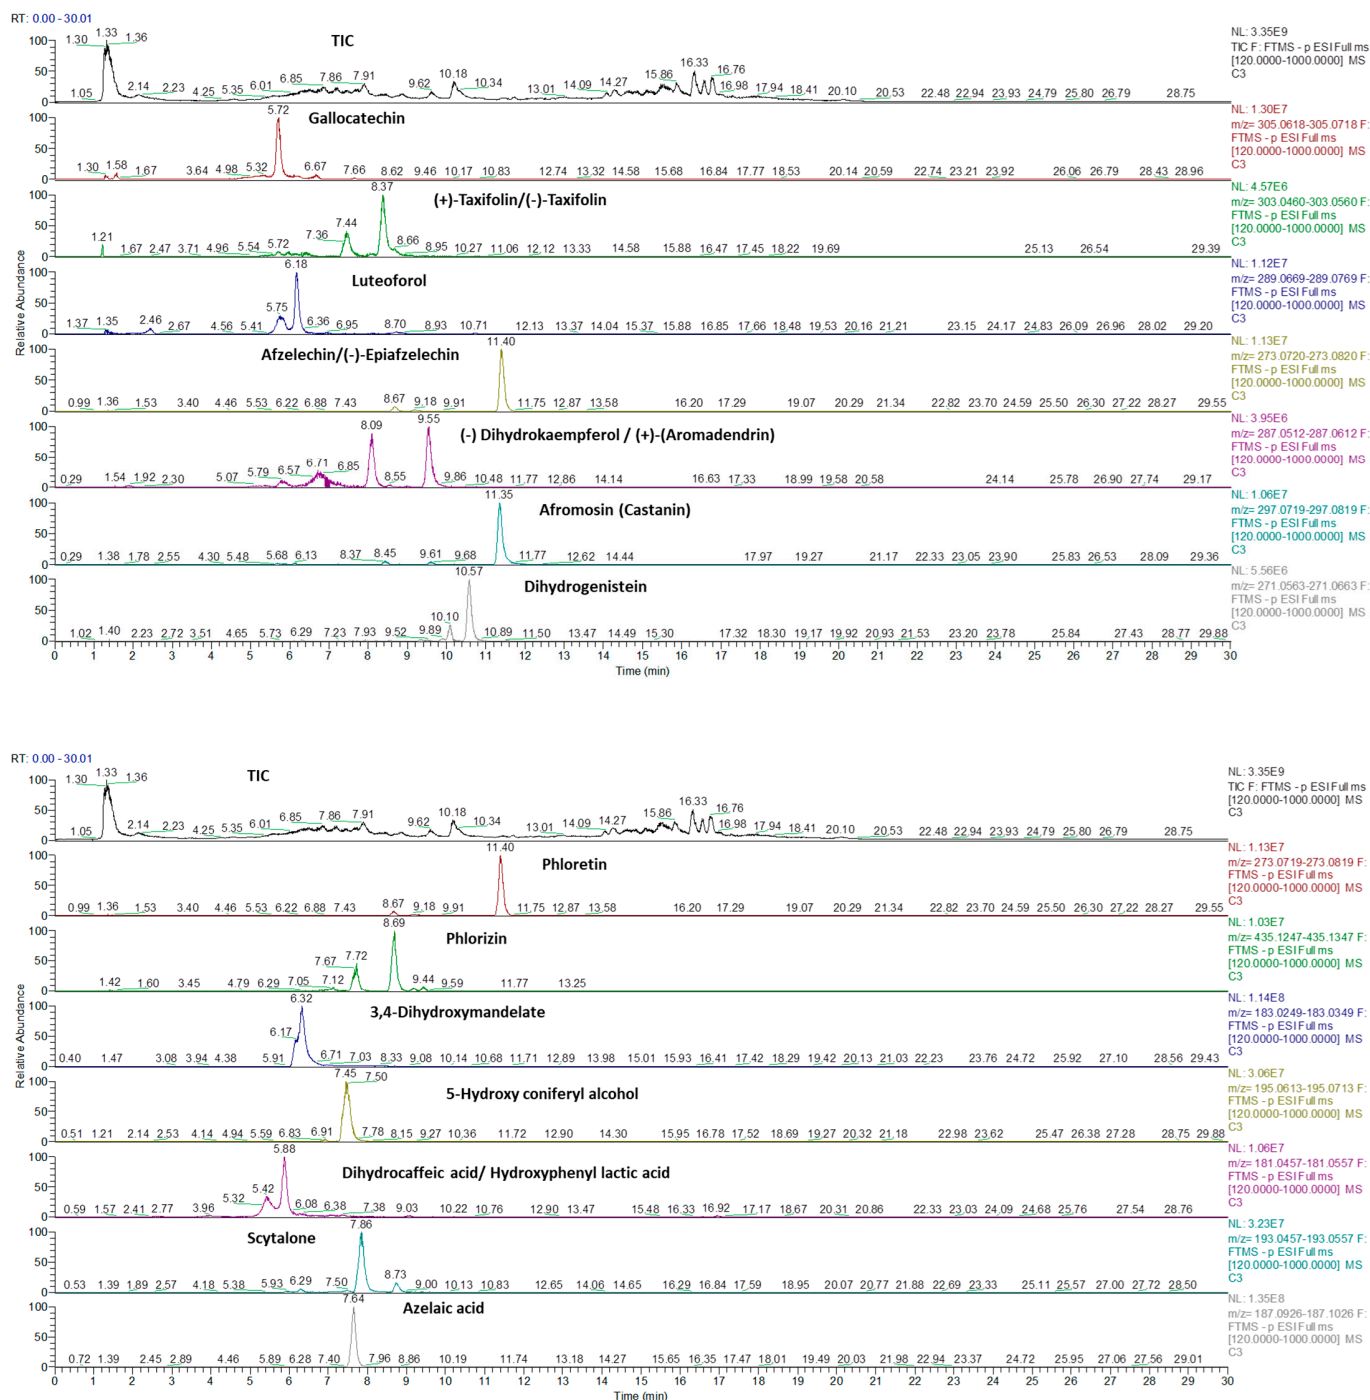

**Figure S5.** TIC and the extracted chromatograms of the main phytochemical compounds identified in chestnut methanolic extract (the chromatograms were extracted from TIC using a 5 ppm mass accuracy window; negative ion mode, full scan, base peak in the range 75-1000 m/z)

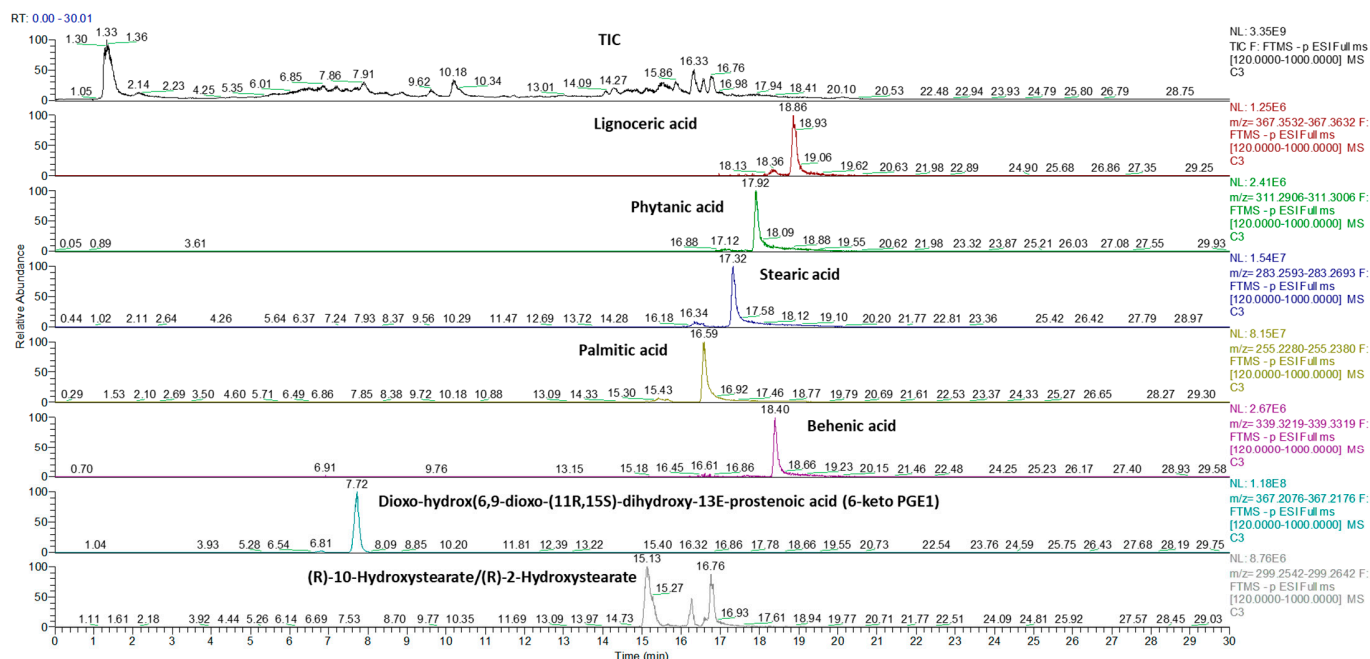

(a)

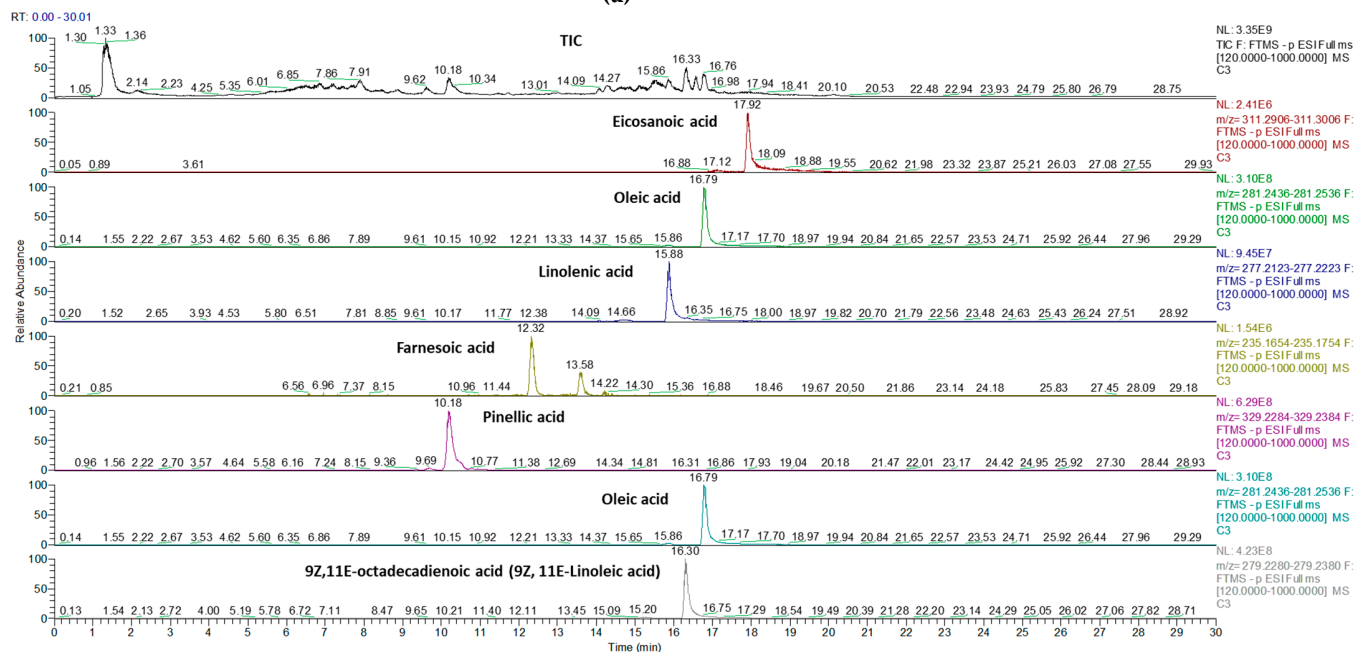

(b)

**Figure S6.** TIC and the extracted chromatograms of the main saturated (a) and unsaturated (b) fatty acids identified in chestnut methanolic extract (the chromatograms were extracted from TIC using a 5 ppm mass accuracy window; negative ion mode, full scan, base peak in the range 75-1000 m/z)

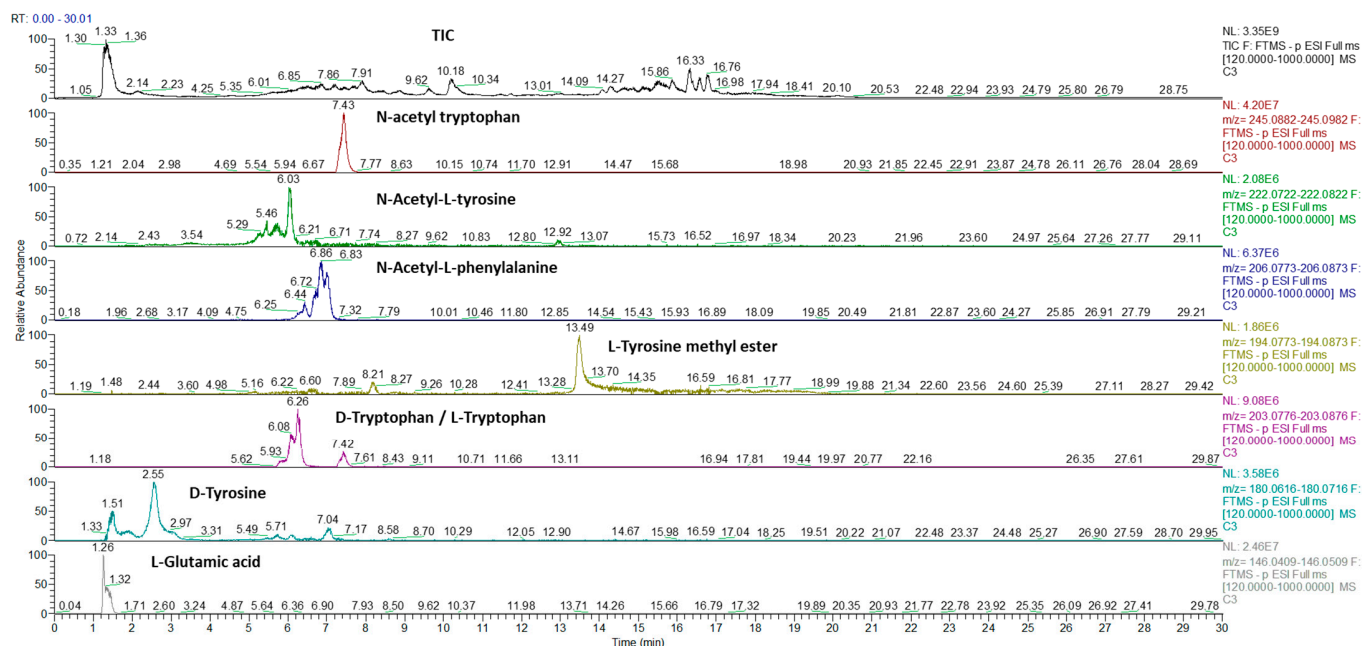

**Figure S7.** TIC and the extracted chromatograms of the main amino acids identified in chestnut methanolic extract (the chromatograms were extracted from TIC using a 5 ppm mass accuracy window; negative ion mode, full scan, base peak in the range 75-1000 m/z)

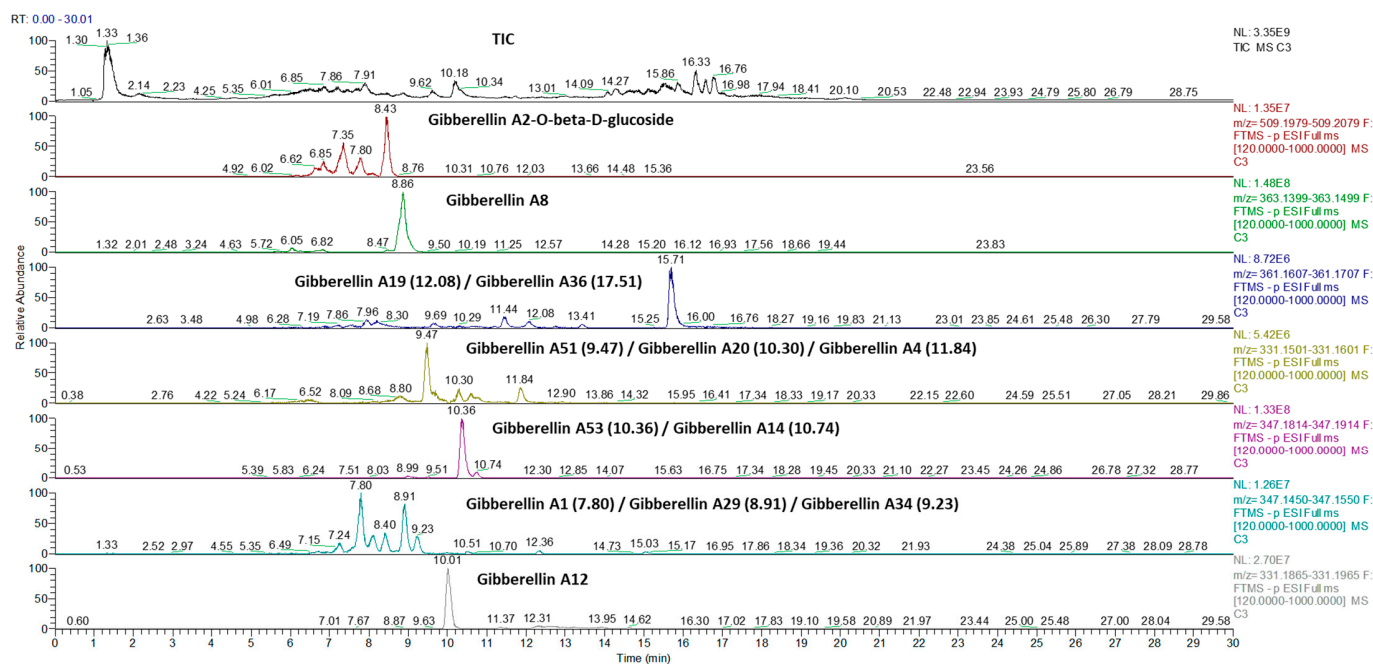

**Figure S8.** TIC and the extracted chromatograms of the main gibberellin plant hormones identified in chestnut methanolic extract (the chromatograms were extracted from TIC using a 5 ppm mass accuracy window; negative ion mode, full scan, base peak in the range 75-1000 m/z)

## 2. Supplementary Tables

**Table S1.** Sums of Growing Degree Hours and Growing Degree Days for the sweet chestnut cultivars

| Cultivar           |                     | $\Sigma$ of Growing Degree Hours (GDH) |       |       |             | $\Sigma$ of Growing Degree Days (GDD, °D) |      |      |             |
|--------------------|---------------------|----------------------------------------|-------|-------|-------------|-------------------------------------------|------|------|-------------|
|                    |                     | 2015                                   | 2016  | 2017  | <i>Mean</i> | 2015                                      | 2016 | 2017 | <i>Mean</i> |
| 'Précocce Migoule' | Start of harvesting | 60100                                  | 61811 | 60486 | 60799       | 2212                                      | 2141 | 2172 | 2175        |
|                    | End of harvesting   | 61755                                  | 62388 | 61352 | 61832       | 2281                                      | 2165 | 2208 | 2218        |
| 'Bournette'        | Start of harvesting | 60421                                  | 61980 | 61168 | 61190       | 2226                                      | 2148 | 2200 | 2191        |
|                    | End of harvesting   | 61578                                  | 63629 | 61794 | 62334       | 2274                                      | 2217 | 2226 | 2239        |
| 'Marsol'           | Start of harvesting | 61054                                  | 61980 | 60977 | 61337       | 2252                                      | 2148 | 2192 | 2197        |
|                    | End of harvesting   | 62032                                  | 63175 | 61587 | 62265       | 2293                                      | 2198 | 2218 | 2236        |
| 'Marissard'        | Start of harvesting | 61348                                  | 62165 | 61352 | 61622       | 2264                                      | 2156 | 2208 | 2209        |
|                    | End of harvesting   | 62388                                  | 63710 | 62062 | 62720       | 2308                                      | 2221 | 2237 | 2255        |
| 'Marigoule'        | Start of harvesting | 62567                                  | 63844 | 62395 | 62935       | 2315                                      | 2226 | 2251 | 2264        |
|                    | End of harvesting   | 63617                                  | 64045 | 62850 | 63504       | 2359                                      | 2235 | 2270 | 2288        |
| 'Maraval'          | Start of harvesting | 62951                                  | 63767 | 62454 | 63057       | 2331                                      | 2223 | 2254 | 2269        |
|                    | End of harvesting   | 63741                                  | 64265 | 63005 | 63670       | 2364                                      | 2244 | 2277 | 2295        |

**Table S2.** Quality performance data for the phenolic acids and flavonoids profiling by UHPLC-MS/MS in negative ionization mode

| No.            | Compound                | Retention time [min] | Accurate mass [M-H] <sup>-</sup> | Mass fragments                                   | Calibration curve |                | Performance characteristics |            |              |
|----------------|-------------------------|----------------------|----------------------------------|--------------------------------------------------|-------------------|----------------|-----------------------------|------------|--------------|
|                |                         |                      |                                  |                                                  | Linearity         | R <sup>2</sup> | LOD (µg/g)                  | LOQ (µg/g) | Recovery (%) |
| Phenolic acids |                         |                      |                                  |                                                  |                   |                |                             |            |              |
| 1              | Gallic acid             | 4.57                 | 169.0133                         | 125.0231                                         | 0-10 mg/L         | 0.9956         | 0.12                        | 0.4        | 85           |
| 2              | 3,4-Dihydroxybenzoic    | 5.46                 | 153.0183                         | 109.0281                                         | 0-7.5 mg/L        | 0.9949         | 0.36                        | 1.2        | 84           |
| 3              | 4-Hydroxybenzoic acid   | 6.37                 | 137.0232                         | 93.0331                                          | 0-10 mg/L         | 0.9914         | 1.08                        | 3.6        | 82           |
| 4              | Chlorogenic acid        | 6.52                 | 353.0879                         | 191.0553                                         | 0-7.5 mg/L        | 0.9639         | 0.12                        | 0.4        | 80           |
| 5              | Syringic acid           | 6.89                 | 197.0450                         | 182.0212, 166.9976, 153.0547, 138.0311, 123.0075 | 0-7.5 mg/L        | 0.9850         | 0.36                        | 1.2        | 86           |
| 6              | Caffeic acid            | 6.68                 | 179.0338                         | 135.044                                          | 0-10 mg/L         | 0.9995         | 0.12                        | 0.4        | 89           |
| 8              | <i>p</i> -Coumaric acid | 7.27                 | 163.0392                         | 119.0489                                         | 0-7.5 mg/L        | 0.9730         | 0.36                        | 1.2        | 93           |
| 9              | <i>t</i> -Ferulic acid  | 7.86                 | 193.0500                         | 178.0262, 134.0361                               | 0-7.5 mg/L        | 0.9879         | 0.6                         | 2.0        | 88           |
| 10             | Ellagic acid            | 8.28                 | 300.9990                         | 300.9990                                         | 0-10 mg/L         | 0.9837         | 1.2                         | 4.0        | 98           |
| 11             | Cinnamic acid           | 8.50                 | 147.0441                         | 119.0489, 103.0387                               | 0-10 mg/L         | 0.9996         | 0.48                        | 1.6        | 84           |
| Catechins      |                         |                      |                                  |                                                  |                   |                |                             |            |              |
| 13             | (+)-Catechin            | 6.18                 | 289.0719                         | 109.0282, 125.0232,                              | 0-10 mg/L         | 0.9919         | 0.36                        | 1.2        | 95           |
| 14             | (-)-Epicatechin         | 6.55                 |                                  | 137.0232, 151.0390, 203.0708, 245.0817           | 0-7.5 mg/L        | 0.9840         | 0.12                        | 0.4        | 86           |
| Flavonols      |                         |                      |                                  |                                                  |                   |                |                             |            |              |
| 15             | Quercetin               | 10.02                | 301.0356                         | 151.0226, 178.9977, 121.0282, 107.0125           | 0-10 mg/L         | 0.9912         | 0.48                        | 1.6        | 92           |
| 16             | Myricetin               | 8.81                 | 317.0305                         | 178.9977, 151.0025                               | 0-10 mg/L         | 0.9980         | 0.36                        | 1.2        | 101          |
| 17             | Naringin                | 7.77                 | 579.1718                         | 363.0721                                         | 0-7.5 mg/L        | 0.9997         | 0.24                        | 0.8        | 95           |
| 18             | Hesperidin              | 7.99                 | 609.1824                         | 377.0876                                         | 0-7.5 mg/L        | 0.9781         | 0.6                         | 2.0        | 84           |
| 19             | Rutin                   | 7.81                 | 609.1462                         | 3345.0614                                        | 0-7.5 mg/L        | 0.9720         | 0.36                        | 1.2        | 99           |
| 20             | Kaempferol              | 11.15                | 285.0406                         | 151.0389, 117.0180                               | 0-7.5 mg/L        | 0.9537         | 0.72                        | 2.4        | 82           |
| 21             | Isorhamnetin            | 11.51                | 315.0512                         | 300.0276                                         | 0-7.5 mg/L        | 0.9582         | 0.24                        | 0.8        | 90           |
| 22             | Apigenin                | 11.81                | 269.0457                         | 117.0333, 151.0027, 107.0126                     | 0-7.5 mg/L        | 0.9927         | 0.36                        | 1.2        | 87           |



|                 |                       |       |          |                                                     |            |        |      |     |     |
|-----------------|-----------------------|-------|----------|-----------------------------------------------------|------------|--------|------|-----|-----|
| <b>23</b>       | Pinocembrin           | 12.02 | 255.0663 | 213.0551, 151.0026, 107.0125                        | 0-10 mg/L  | 0.9866 | 0.6  | 2.0 | 96  |
| <b>24</b>       | Chrysin               | 12.93 | 253.0506 | 143.0491, 145.0284,<br>107.0125, 209.0603, 63.0226, | 0-7.5 mg/L | 0.9731 | 0.48 | 1.6 | 100 |
| <b>25</b>       | Galangin              | 12.58 | 269.0458 | 169.0650, 143.0491                                  | 0-7.5 mg/L | 0.9595 | 0.72 | 2.4 | 96  |
| <b>26</b>       | Pinostrobin           | 14.35 | 269.081  | 179.0554                                            | 0-10 mg/L  | 0.9947 | 0.72 | 2.4 | 95  |
| <b>Stilbens</b> |                       |       |          |                                                     |            |        |      |     |     |
| <b>27</b>       | <i>t</i> -Resveratrol | 8.25  | 227.0707 | 185.0813, 143.0337                                  | 0-7.5 mg/L | 0.9959 | 0.48 | 1.6 | 91  |

**Table S3.** Climatic conditions (temperature and precipitation) in the main European chestnut producing countries and Romania during 2017, 2016 and 2017 harvest year according to <https://climateknowledgeportal.worldbank.org/>

|                 | 2015                    |                     | 2016                    |                     | 2017                    |                     | Average                 |                     |
|-----------------|-------------------------|---------------------|-------------------------|---------------------|-------------------------|---------------------|-------------------------|---------------------|
|                 | T <sub>mean</sub><br>°C | Precipitation<br>mm |
| <b>Italy</b>    | 13.52                   | 776.87              | 13.34                   | 847.76              | 13.19                   | 749.33              | 13.35                   | 791.32              |
| <b>Spain</b>    | 14.48                   | 472.9               | 14.34                   | 628.21              | 14.59                   | 453.6               | 14.47                   | 518.24              |
| <b>Portugal</b> | 16.07                   | 547.74              | 15.94                   | 926.14              | 16.33                   | 559.91              | 16.11                   | 677.93              |
| <b>Turkey</b>   | 11.76                   | 624.88              | 12.15                   | 619.92              | 11.92                   | 513.42              | 11.94                   | 586.07              |
| <b>Romania</b>  | 10.79                   | 615.54              | 10.38                   | 738.28              | 10.36                   | 653.63              | 10.51                   | 669.15              |
